# Supplementary material for: LncRNA IFITM4P promotes immune escape by up-regulating PD-L1 via dual mechanism in oral carcinogenesis
Source: PubMed Central journal article supplement (PMC9077312; doi:10.1016/j.ymthe.2022.01.003), 2022-01-17
Supplement: mmc1.pdf [file mmc1.pdf]

YMTHE, Volume 30

## **Supplemental Information**

**LncRNA IFITM4P promotes immune escape  
by up-regulating PD-L1 via dual mechanism  
in oral carcinogenesis**

**Linjun Shi, Yuquan Yang, Mengying Li, Chenxi Li, Zengtong Zhou, Guoyao Tang, Lan  
Wu, Yilin Yao, Xuemin Shen, Zhaoyuan Hou, and Hao Jia**

# Supplementary Figure. 1

## IFITM4P VS Vector

**A**

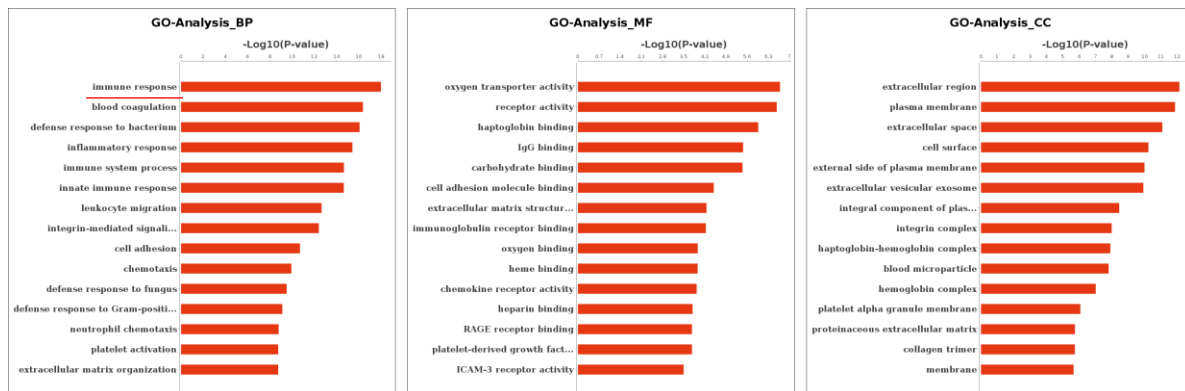

**B**

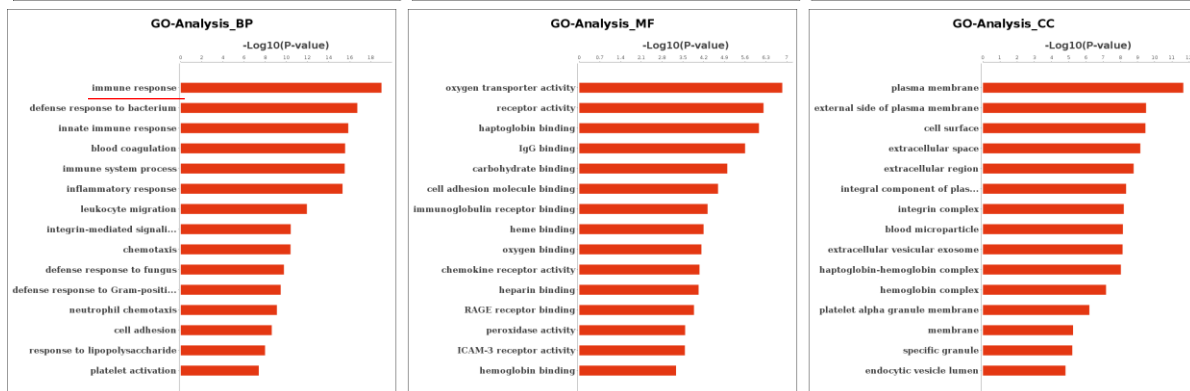

**C**

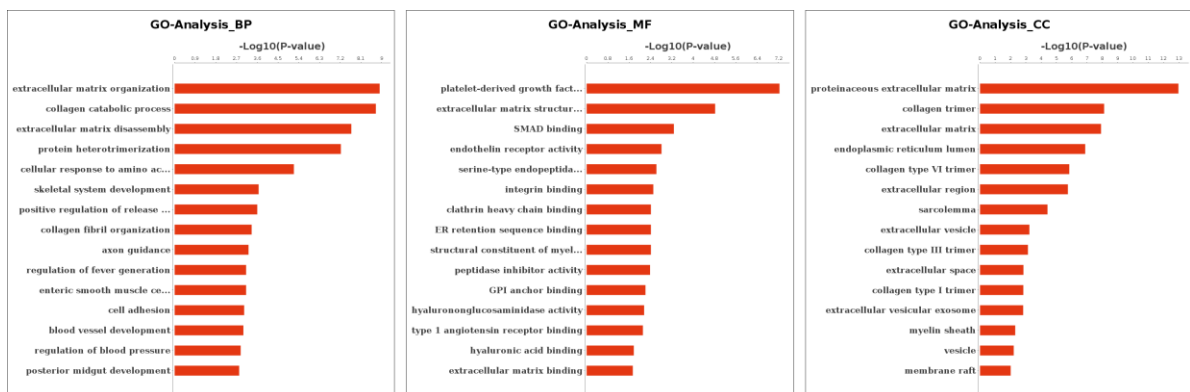

**D**

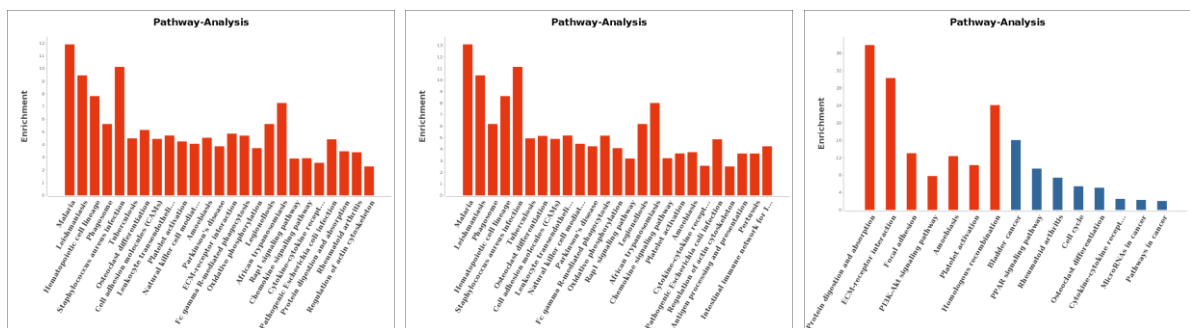

Enriched GO functions and KEGG pathway-Analysis of differentially expressed genes. GO analysis of all changed genes (A), upregulated (B) and down-regulated (C) genes.

(D) KEGG pathway analysis of differentially expressed genes. Left: All of changed genes KEGG pathway analysis, middle: upregulated genes, right: downregulated genes.

KEGG pathway analysis. KEGG, Kyoto Encyclopedia of Genes and Genomes.

## Supplementary Figure. 2

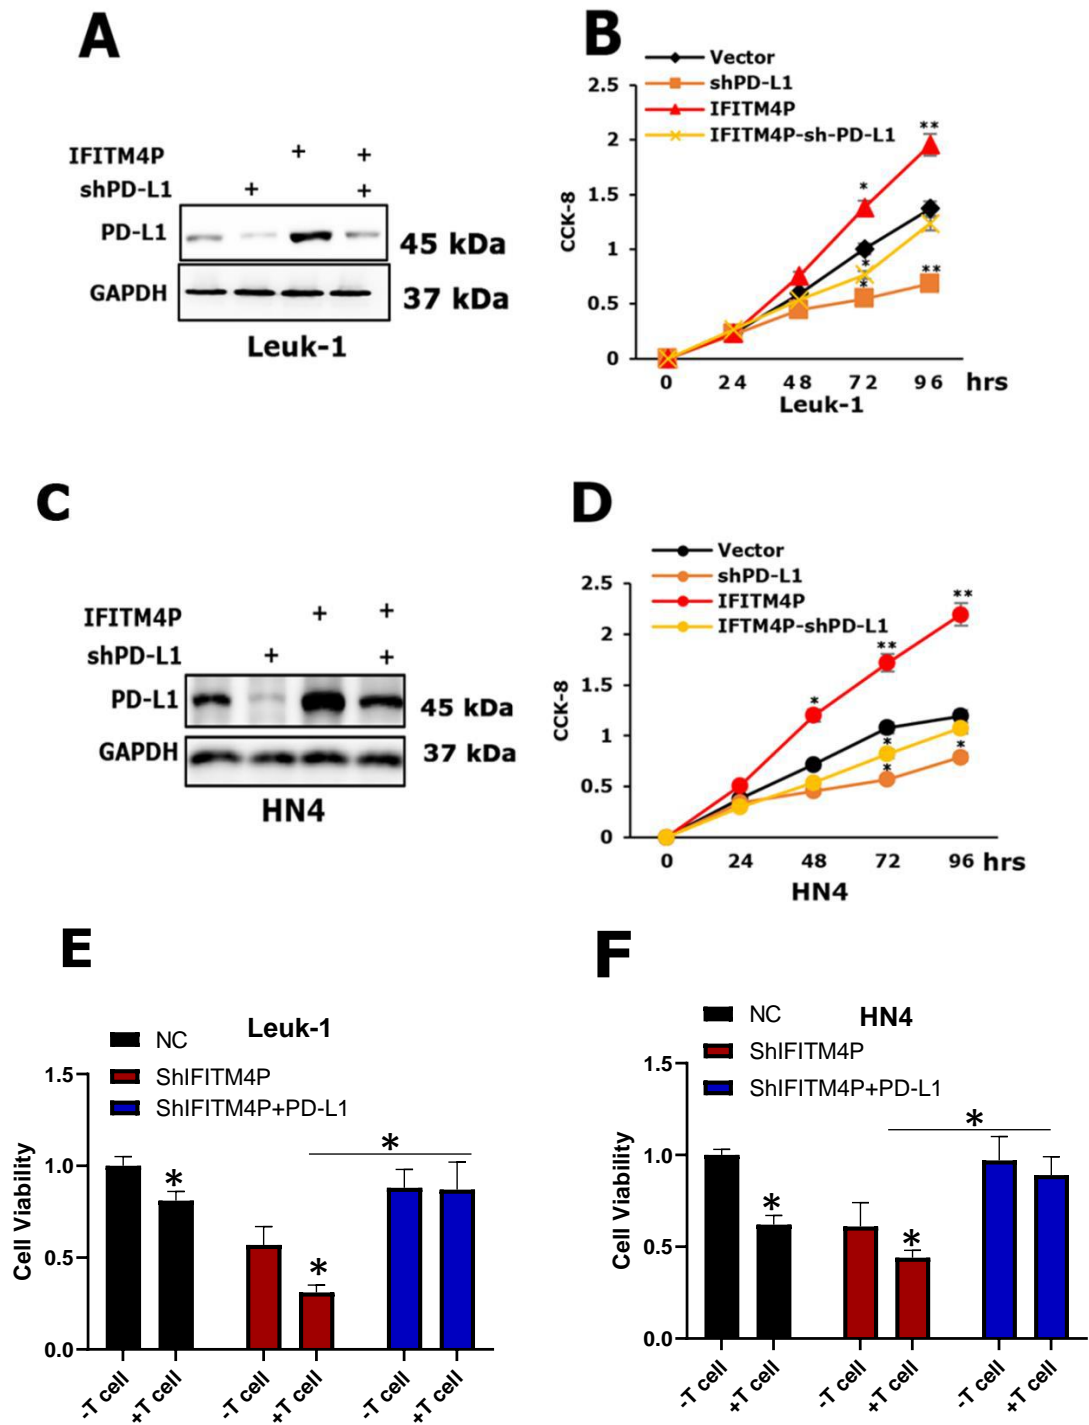

(A) Stable expression of PD-L1 treated with IFITM4P and shPD-L1 in Leuk-1 cells.

(B) Effect of IFITM4P and shPD-L1 on growth in Leuk-1 cells overexpressing the empty vector or IFITM4P-Leuk-1. Cell proliferation was measured using the CCK-8 assay.

(C) Stable expression of PD-L1 in HN4 cells treated with IFITM4P and shPD-L1.

(D) Effect of IFITM4P and shPD-L1 on growth in HN4 cells overexpressing the empty vector or IFITM4P-Leuk-1. Cell proliferation was measured using the CCK assay.

(E,F) T cell-mediated cancer cell-killing assay results. Leuk-1 (E) or HN4 (F) cells cocultured with activated T cell for 48 h were subjected to crystal violet staining. The ratio of Leuk-1 or HN4 to T cell is 1:3.

### Supplementary Figure. 3

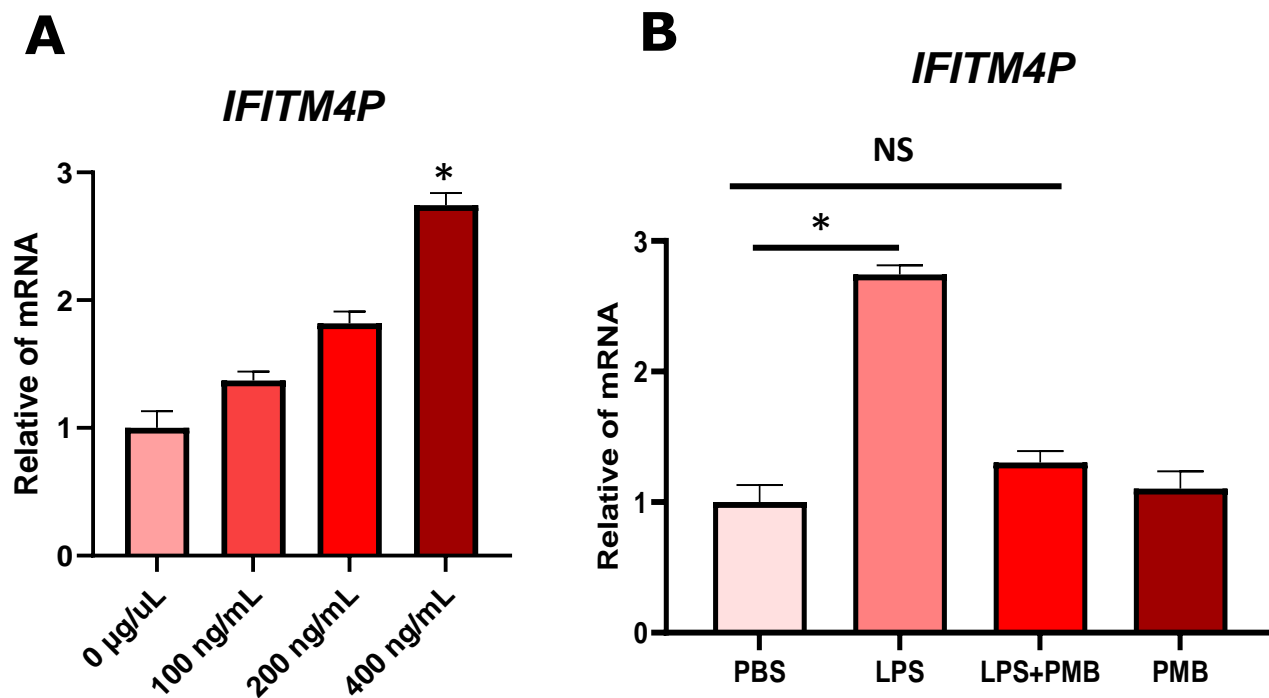

(A) qRT-PCR showed a dose-dependent increase in LPS-induced *IFITM4P* transcription after 12hrs in Leuk-1 cells.

(B) Comparison of the effects of LPS (400 ng/mL) alone and LPS (400 ng/mL) +PMB (10 µg/mL) treatment on *IFITM4P* after 12 hrs of incubation. Data were shown as mean  $\pm$  s.d. from three independent. NS = no significant difference. \*P < 0.05.

## Supplementary Figure. 4

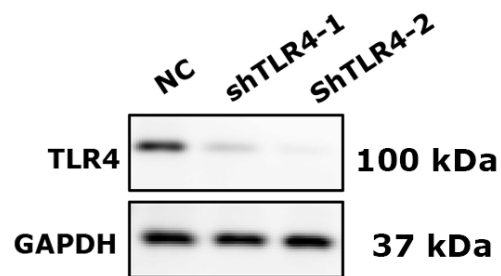

Western blotting shows stable expression of shTLR4 in Leuk-1 cells.

## Supplementary Figure. 5

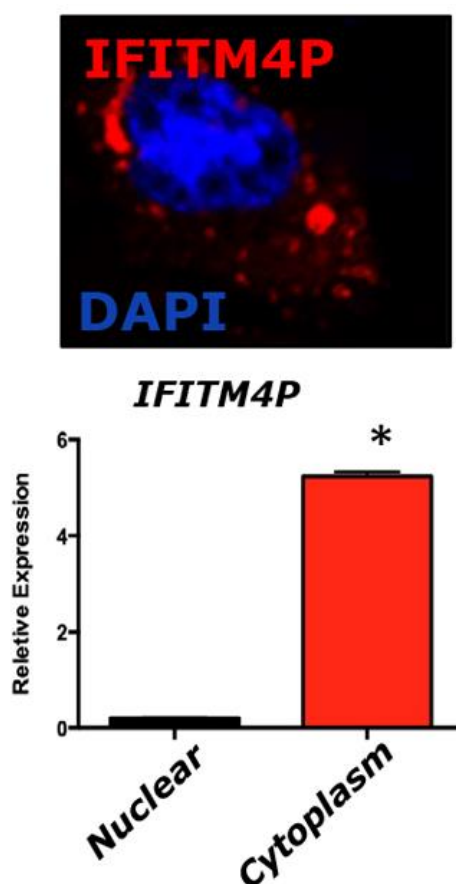

Top: Images taken by confocal microscopy shows the localization of IFITM4P detected by FISH assays in Leuk-1 cells. A representative image is shown at 400× magnification.

Bottom: qRT-PCR shows IFITM4P expression in the nuclear and cytoplasmic fractions of Leuk-1 cells. Data were shown as mean  $\pm$  s.d. from three independent. \*P < 0.05.

## Supplementary Figure. 6

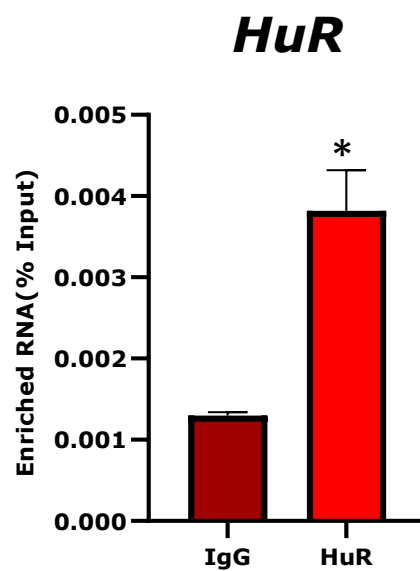

RIP assays validate the association of HuR-prober with HuR in Leuk-1 cells. HuR served as positive controls. (n=3), Data were shown as mean  $\pm$  s.d. from three independent. \*P < 0.05.

## Supplementary Figure. 7

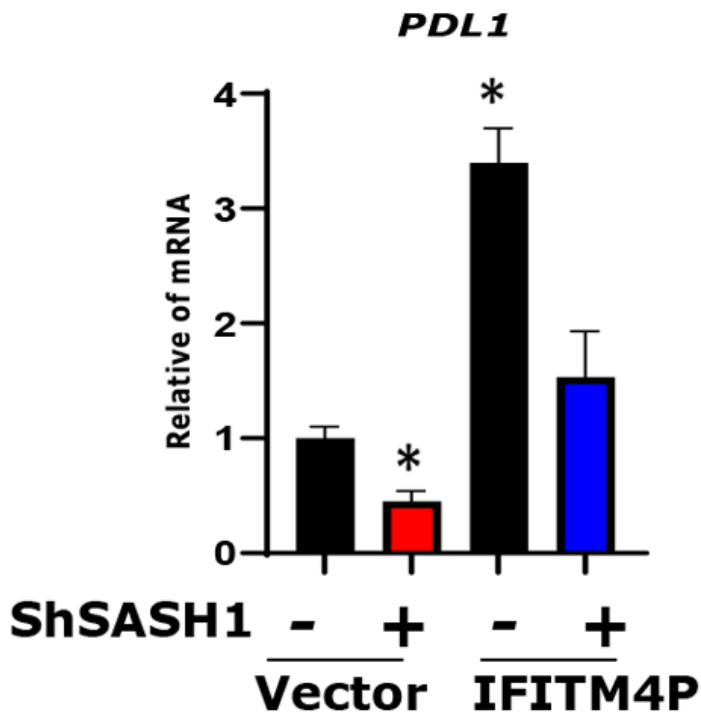

qRT-PCR show that the expression of *PD-L1* in IFITM4P overexpressing cells is significantly decreased upon knockdown of SASH1 using ShSASH1. Data were shown as mean  $\pm$  s.d. from three independent. \*P < 0.05.



## Supplementary Figure. 8

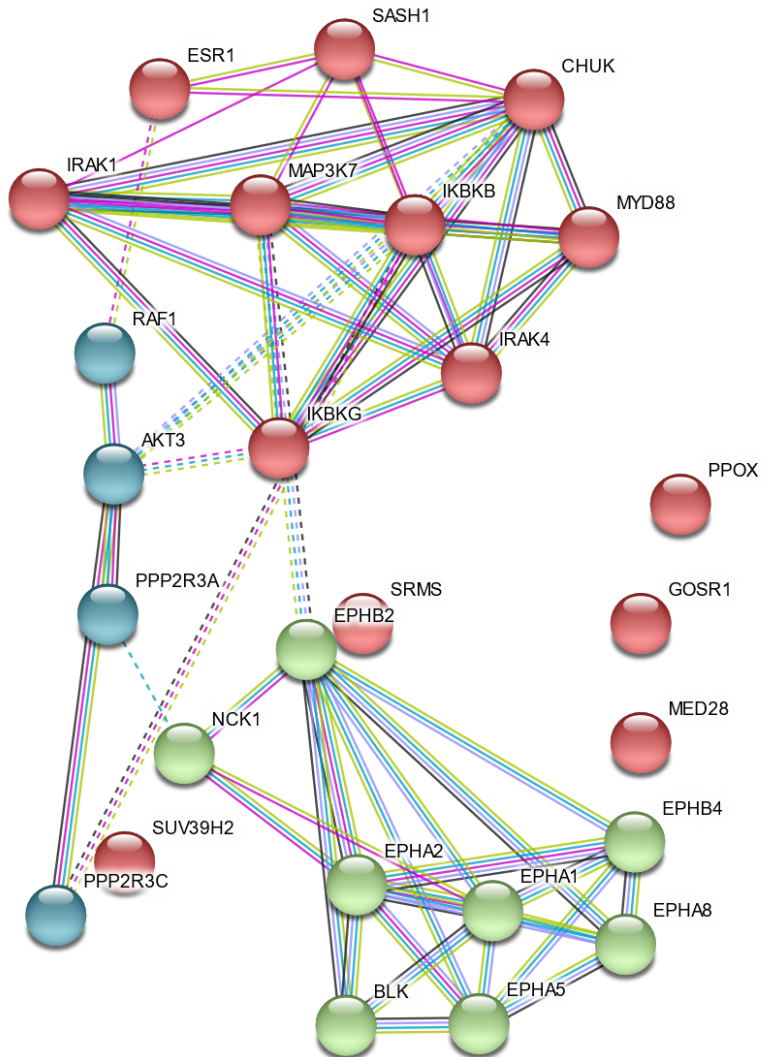

**Bioinformatics analysis of the interaction network of SASH1 associated proteins (<https://www.genecards.org/>). MAP3K7 (TAK1)**

## Supplementary Figure. 9

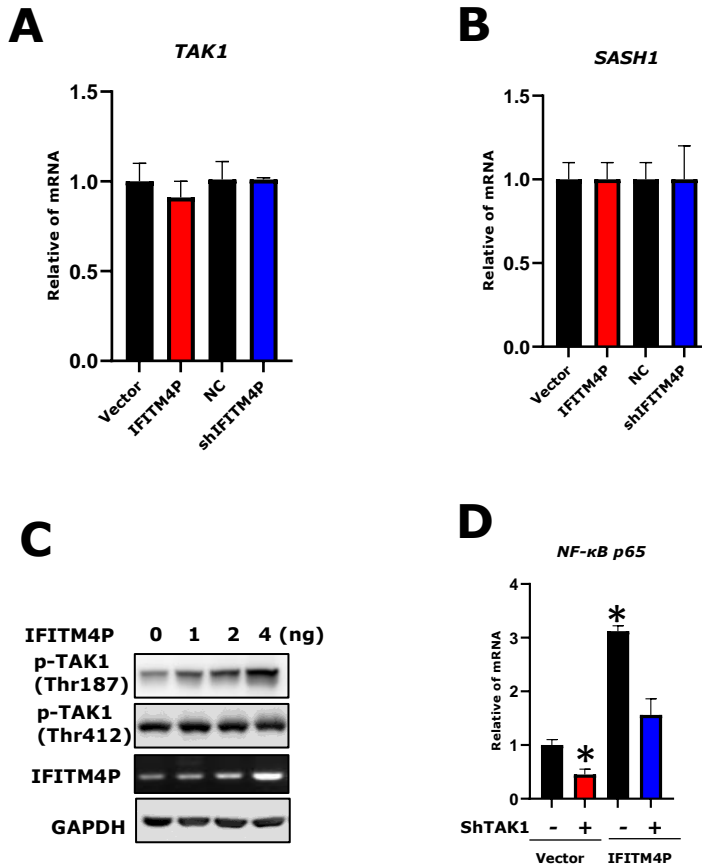

(A) (B) The results showed that IFITM4P did not show any apparent effect on the expression of TAK1 and SASH1.

(C) Phosphorylation of TAK1(Thr187) was obviously enhanced by IFITM4P dose (0-4 ng) in Leuk-1 cells, but phosphorylation of TAK1(Thr412) was not apparently changed.

(D) Knockdown of SASH1 in Leuk-1-IFITM4P repressed the mRNA of NF-κB p65. Data from A,B,D were shown as mean  $\pm$  s.d. from three independent.

\*P < 0.05.

## Supplementary Figure. 10

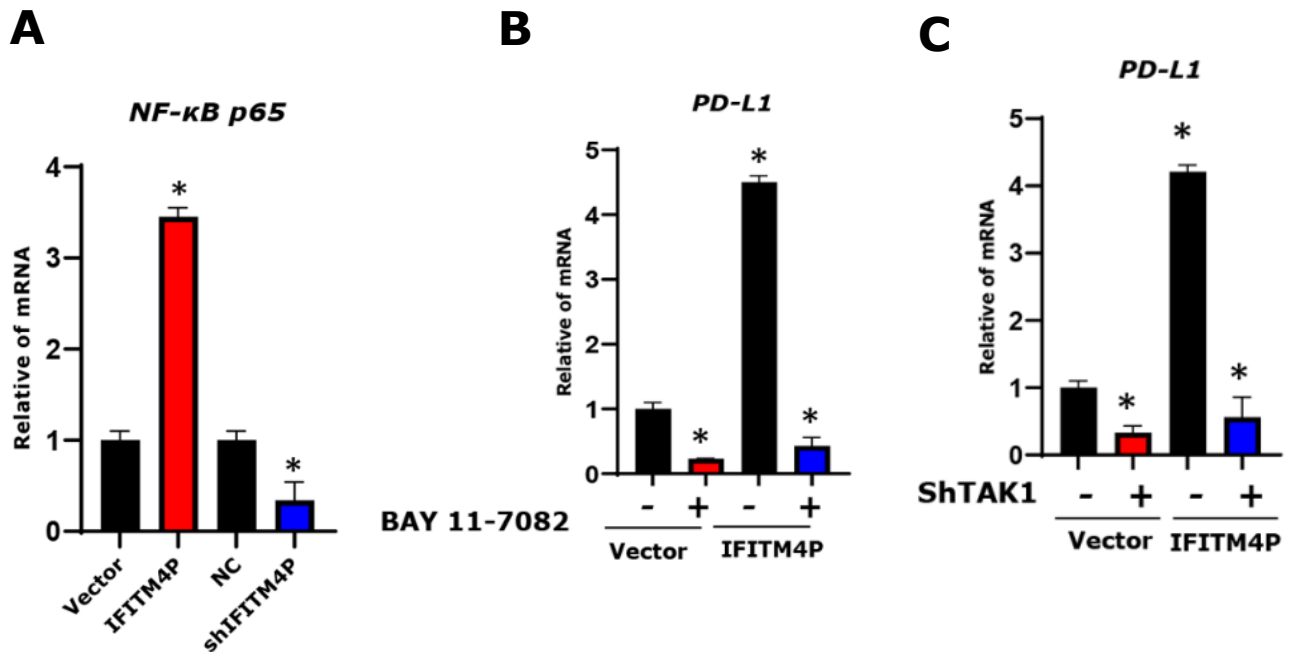

(A) NF-κB p65 levels are increased by the ectopic expression of IFITM4P in Leuk-1 cells and decreased by its knockdown.

(B) qRT-PCR shows repression of *PD-L1* transcription in BAY 11-7082 (10μM)-treated Leuk-1 cells, expressing either vector or IFITM4P.

(C) qRT-PCR analysis show that knockdown of TAK1 with shTAK1 repressed *PD-L1* transcription in IFITM4P expressing Leuk-1 cells.

Data from A,B,C were shown as mean  $\pm$  s.d. from three independent.

\*P < 0.05.

## Supplementary Figure. 11

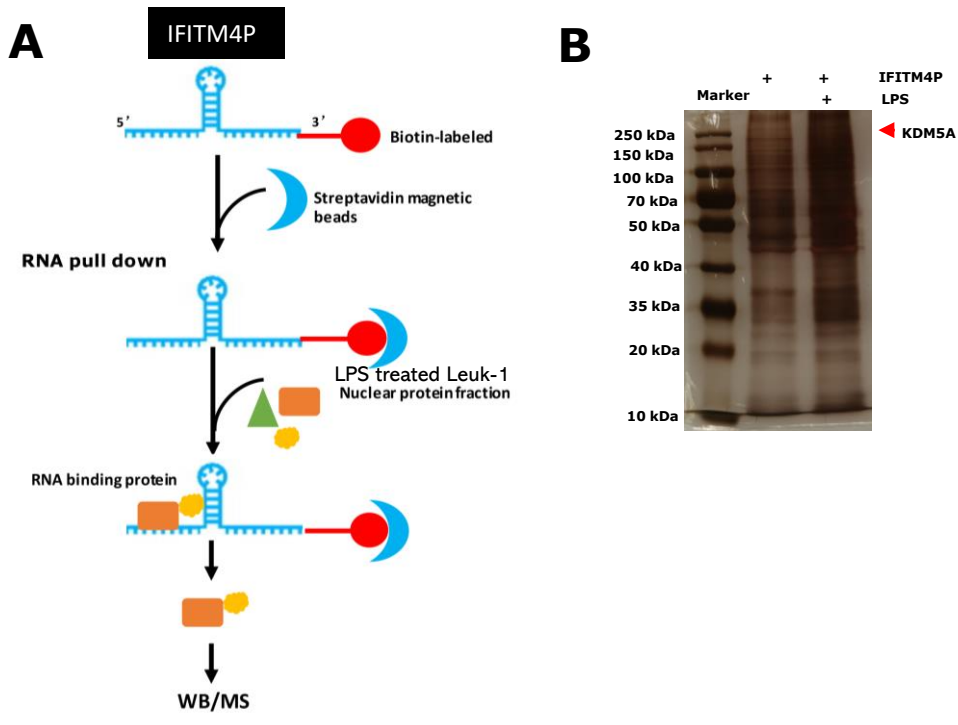

(A) Schematic of the RNA pulldown experiment for the identification of proteins associated with IFITM4P.

(B) Leuk-1 with stable overexpression of IFITM4P was treated with LPS for 12 h. IFITM4P and its associated complexes were enriched by IP with streptavidin magnetic beads.

## Supplementary Figure. 12

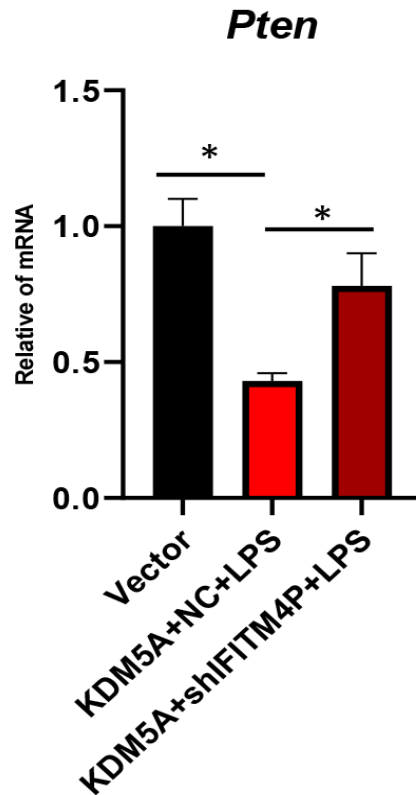

RT-PCR analysis of relative *Pten* mRNA expression in Vector and KDM5A-overexpressing Leuk-1 cells under LPS (100  $\mu$ g/ml) treatment. Data were shown as mean  $\pm$  s.d. from three independent. \*P < 0.05.

## Supplementary Figure. 13

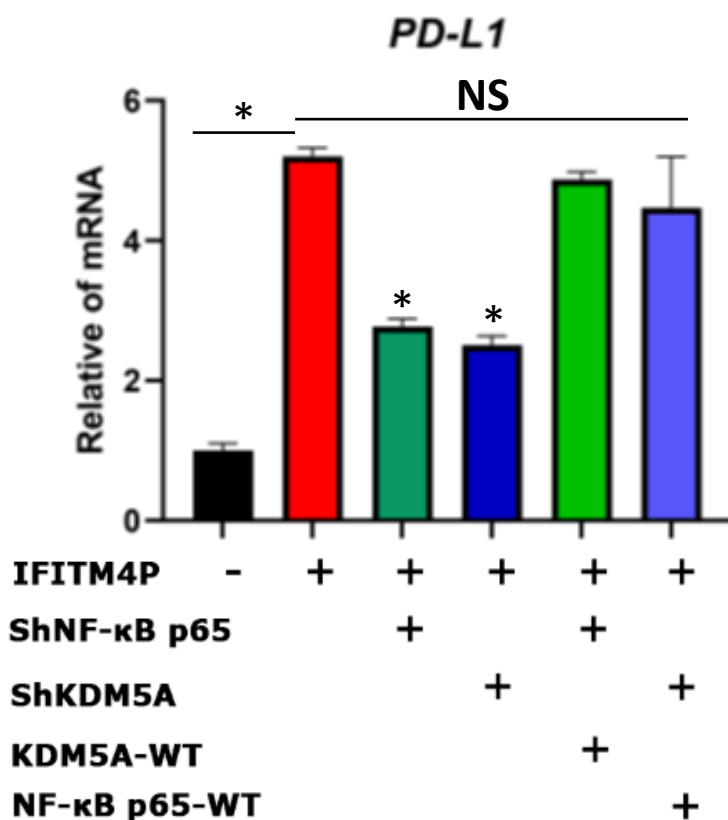

IFITM4P-HN4 and Vector-HN4 cells transiently transfected with ShRNAs to NF-κB p65 or KDM5A or scrambled control (ShRNA-NC), KDM5A or NF-κB p65, vector were treated with LPS (100 μg/ml). qRT-PCR showed a significant decrease in PD-L1 expression following the knockdown of KDM5A, and NF-κB p65, while KDM5A or NF-κB p65 increased the expression of PD-L1. Data were shown as mean ± s.d. from three independent. \*P < 0.05. NS = no significant difference. WT = wild type.

## Supplementary Figure. 14

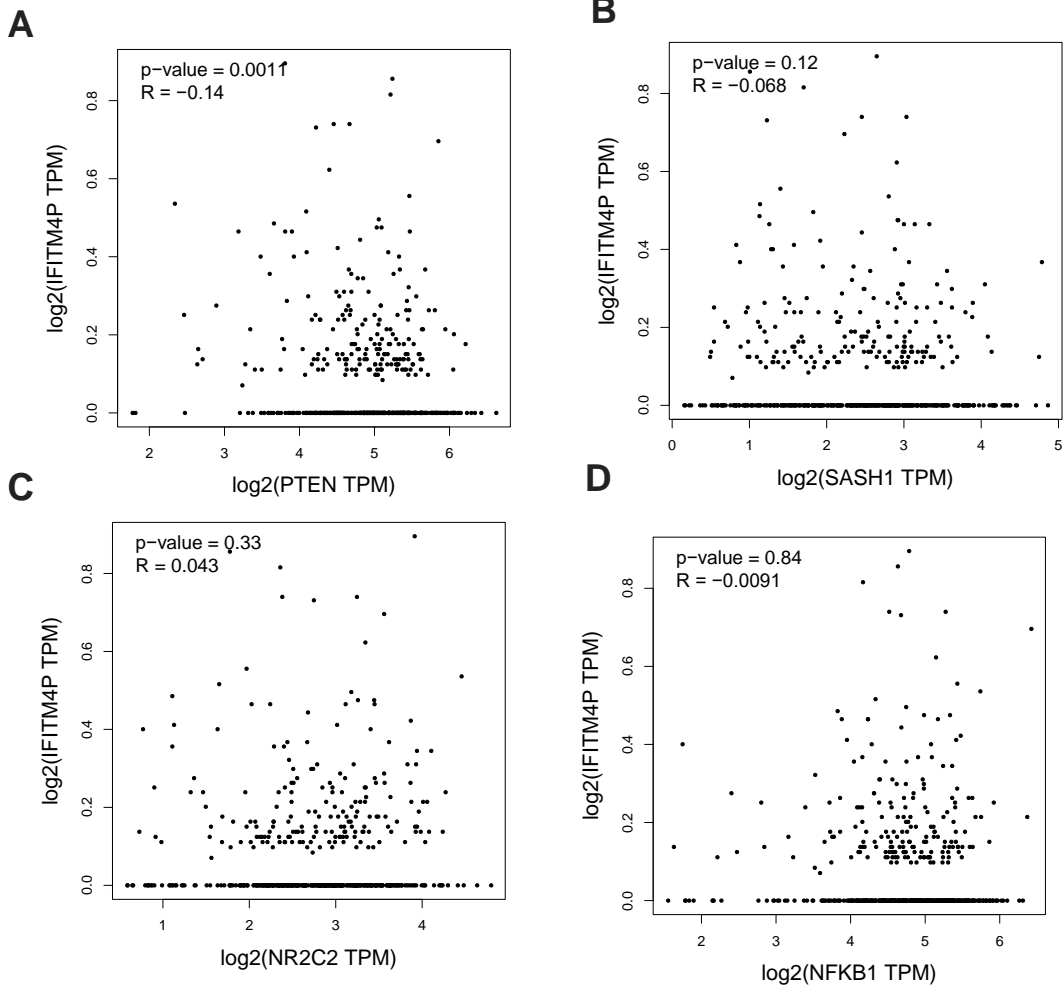

Data from The Cancer Genome Atlas (TCGA) indicated negative correlation between the levels of IFITM4P and PTEN (A) in HNSC samples (n = 518) (\*P < 0.05), but no correlation between the levels of IFITM4P with SASH1(B), NR2C2(TAK1)(C), and NFKB1(D).

**Supplementary Table 1. Clinicopathological information of patients in LncRNA microarray experiment**

| Number | sex* | age | site    | Diagnosis** | epithelial dysplasia | OL-staging | OSCC-staging |
|--------|------|-----|---------|-------------|----------------------|------------|--------------|
| 1      | F    | 76  | tongue  | NM          | /                    | /          | /            |
| 2      | F    | 66  | tongue  | NM          | /                    | /          | /            |
| 3      | F    | 46  | gingiva | NM          | /                    | /          | /            |
| 4      | M    | 41  | tongue  | OL          | mild                 | III        | /            |
| 5      | F    | 51  | tongue  | OL          | mild                 | III        | /            |
| 6      | F    | 47  | tongue  | OL          | none                 | II         | /            |
| 7      | M    | 37  | tongue  | OL          | mild                 | III        | /            |
| 8      | M    | 39  | tongue  | OSCC        | /                    | /          | II           |
| 9      | M    | 48  | tongue  | OSCC        | /                    | /          | II           |
| 10     | F    | 72  | tongue  | OSCC        | /                    | /          | II           |
| 11     | M    | 55  | tongue  | OSCC        | /                    | /          | II           |
| 12     | M    | 66  | tongue  | OSCC        | /                    | /          | II           |

\* Sex: F, female; M, male

\*\* NM, normal mucosa; OL, oral leukoplakia; OSCC, squamous cell carcinoma



**Supplementary Table 2. Baseline characteristics of the patients enrolled in qRT-PCR validation of *IFITM4P* and *PD-L1* expression**

|                                        | <b>NM group</b> | <b>OL group</b> | <b>OSCC group</b> | <b>P</b> |
|----------------------------------------|-----------------|-----------------|-------------------|----------|
|                                        | <b>N (%)</b>    | <b>N (%)</b>    | <b>N (%)</b>      |          |
| <b>sex</b>                             |                 |                 |                   |          |
| female                                 | 13 (56.52%)     | 34 (50.75%)     | 15 (32.61%)       | 0.084    |
| male                                   | 10 (43.48%)     | 33 (49.25%)     | 31 (67.39%)       |          |
| <b>age</b>                             |                 |                 |                   |          |
| mean ± sd                              | 48.957±13.4342  | 58.194±13.4268  | 67±12.0831        | <0.001   |
| <b>smoking</b>                         |                 |                 |                   |          |
| never                                  | 12 (52.17%)     | 37 (55.22%)     | 26 (56.52%)       | 0.511    |
| present or past                        | 8 (34.78%)      | 28 (41.79%)     | 12 (26.09%)       |          |
| N/A                                    | 3 (13.04%)      | 2 (2.99%)       | 8 (17.39%)        |          |
| <b>alcohol intake</b>                  |                 |                 |                   |          |
| never                                  | 13 (56.52%)     | 41 (61.19%)     | 25 (54.35%)       | 1.000    |
| present or past                        | 0               | 24 (35.82%)     | 13 (28.26%)       |          |
| N/A                                    | 10 (43.48%)     | 2 (2.99%)       | 8 (17.39%)        |          |
| <b>OL lesion area (mm<sup>2</sup>)</b> |                 |                 |                   |          |
| <200                                   |                 | 37 (55.22%)     |                   | 0.621    |
| ≥200                                   |                 | 27 (40.30%)     |                   |          |
| NA                                     |                 | 3 (4.48%)       |                   |          |
| <b>OL site</b>                         |                 |                 |                   |          |
| Others                                 | 16 (69.57%)     | 42 (62.69%)     |                   | 0.621    |
| Lateral/Ventral Tongue                 | 7 (30.43%)      | 25 (37.31%)     |                   |          |
| <b>lesion type</b>                     |                 |                 |                   |          |
| homogeneous                            |                 | 45 (67.16%)     |                   | 0.621    |
| nonhomogeneous                         |                 | 22 (32.84%)     |                   |          |
| <b>OL-staging</b>                      |                 |                 |                   |          |
| I                                      |                 | 10 (14.93%)     |                   | 0.621    |
| II                                     |                 | 3 (4.48%)       |                   |          |
| III                                    |                 | 45 (67.16%)     |                   |          |
| IV                                     |                 | 9 (13.43%)      |                   |          |
| <b>OSCC site</b>                       |                 |                 |                   |          |
| non tongue                             |                 |                 | 31 (67.39%)       | 0.621    |
| tongue                                 |                 |                 | 15 (32.61%)       |          |
| <b>nerve invasion</b>                  |                 |                 |                   |          |
| no                                     |                 |                 | 38 (82.61%)       | 0.621    |
| yes                                    |                 |                 | 8 (17.39%)        |          |
| <b>histologic differentiation*</b>     |                 |                 |                   |          |
| well                                   |                 |                 | 37 (80.43%)       | 0.621    |
| moderate                               |                 |                 | 9 (19.57%)        |          |
| poor                                   |                 |                 | 0 (0%)            |          |
| <b>OSCC-clinical staging</b>           |                 |                 |                   |          |
| I                                      |                 |                 | 9 (19.57%)        | 0.621    |

|     |             |
|-----|-------------|
| II  | 28 (60.87%) |
| III | 7 (15.22%)  |
| IV  | 2 (4.35%)   |

---

Supplementary Table 3

| Reagent or Resource                                    | Source                                  | Identifier     |
|--------------------------------------------------------|-----------------------------------------|----------------|
| <b>Antibodies</b>                                      |                                         |                |
| PD-L1 Rabbit mAb                                       | Immunoway                               | YT6033         |
| TLR4 Rabbit mAb                                        | Abcam                                   | AB_2835322     |
| KDM5A Rabbit mAb                                       | Abcam                                   | AB 70892       |
| SASH1 Rabbit mAb                                       | Immunoway                               | YT7427         |
| TAK1 Rabbit mAb                                        | Cell Signaling technology               | Cat# 5602S     |
| HA Rabbit mAb                                          | Santa Cruz                              | Cat# sc-7392   |
| TAK1 Rabbit mAb                                        | Cell Signaling technology               | Cat# 5602S     |
| Phospho-TAK1 (Thr187) Antibody                         | Cell Signaling technology               | Cat# 4536      |
| Phospho-TAK1 (Thr412) Antibody                         | Cell Signaling technology               | Cat# 9339      |
| GAPDH Rabbit (D16H11)                                  | Cell Signaling technology               | Cat#5174       |
| Phospho-NF- $\kappa$ B p65 (Ser536) mouse mAb          | Cell Signaling technology               | Cat# 3036      |
| NF- $\kappa$ B p65 Rabbit mAb                          | Cell Signaling technology               | Cat# 8242      |
| Anti-Myc mAb                                           | Cell Signaling technology               | Cat #2276      |
| <b>Chemicals</b>                                       |                                         |                |
| Lipofectamine 3000                                     | Thermo SCIENTIFIC                       | Cat#L3000001   |
| puromycin                                              | Sigma Aldrich                           | Cat#P8833      |
| BAY 11-7082                                            | MCE                                     | Cat#HY-13453   |
| LPS                                                    | MCE                                     | Cat#HY-D1056   |
| TAK-242                                                | MCE                                     | Cat#HY-11109   |
| Polymyxin B sulfate                                    | MCE                                     | Cat#HY-A0248   |
| <b>Oligonucleotides Primers; See Table S5</b>          |                                         |                |
| <b>Critical Commercial Assays</b>                      |                                         |                |
| Pierce TM Magnetic RNA-Protein Pull-Down Kit           | Thermo SCIENTIFIC                       | Cat#20164      |
| Malachite Green Phosphate Assay Kit                    | Cayman Chemical                         | Cat#1009325-96 |
| Reverse Transcriptase Kit                              | Thermo SCIENTIFIC                       | Cat#18080044   |
| T7 Transcription Kit                                   | Thermo SCIENTIFIC                       | Cat#1354       |
| RNAscope 2.0HD probe detection Kit                     | Advanced cell diagnostics               | Cat#564781     |
| SimpleChIP® Enzymatic Chromatin IP Kit (Agarose Beads) | Cell Signaling technology               | Cat #9002      |
| <b>Experimental Models: Cell Lines</b>                 |                                         |                |
| Human: Leuk-1                                          | American Type Culture Collection(ATCC)  |                |
| Human: HN4                                             | American Type Culture Collection (ATCC) |                |
| Human: 293T                                            | American Type Culture Collection (ATCC) |                |
| <b>Experimental Models: Organisms</b>                  |                                         |                |
| B6/C57J                                                | Shanghai SLAC Laboratory Animal Co.,Ltd | TD.09152       |

Supplementary Table 4

| No.         | Gene Symbol    | GeneBank     | Forward primer                | Reverse primer                 | Ta(°C) |
|-------------|----------------|--------------|-------------------------------|--------------------------------|--------|
| 1           | IFITM4P        | NR_001590.1  | CACTGCCCAAACCTTCTT            | TGCTCCTCCTTGAGCATC             | 55     |
| 2           | $\beta$ -actin | DQ407611.1   | CATTCCAAATATGAGATGCGTT        | TACACGAAAGCAATGCTATCAC         | 60     |
| 3           | TAK1           | AF218074.1   | GGATCCGGGATCATGTCGACAGCCTCCGC | CGCGGTACCTGAAGTGCCTTGTCGTTTCTG | 55     |
| 4           | SASH1          | NM_015278.3  | ATACCTCGGCTTGACATT            | ATACCTCGGCTTGACATT             | 60     |
| 5           | PD-L1          | NM_001267706 | TGCCGACTACAAGCGAATTACTG       | CTGCTTGTCCAGATGACTTCGG         | 55     |
| 6           | NF-KB<br>P65   | NM_021975.3  | ATGCGCTTCCGCTACAAGTG          | ACAATGGCCACTTGTCGGTG           | 55     |
| For<br>ChIP | P1             |              | GCTTAGGTCTCAACTCAGA           | CATCAACTCCAATGTAGGTAG          | 58     |
|             | P2             |              | GGCTGTACGCTAGTTATCA           | GTTAGGCTTACCGATGTTG            | 58     |
